# Supplementary material for: Measuring Somatic Complaints in Primary School Children: Validation and Revision of the German Children’s Somatization Inventory (CSI) and its Parental Version
Source: Springer Nature journal article supplement (doi:10.1007/s10578-014-0520-0), 2014-11-22
Supplement: MOESM1 [file 530470]

Supplement 1. Final Revised Version of the German (P-)CSI.

| CSI | | P-CSI |
| --- | --- | --- |
| 1 | Kopfschmerzen |  |
| 2 | Schwäche- oder Schwindelgefühl |  |
| 3 | Herz- oder Brustschmerzen |  |
| 4 | Energiemangel oder Erschöpfung |  |
| **5** | **Schmerzen im unteren Rückenbereich** |  |
| **6** | **Muskelschmerzen oder -kater** |  |
| ***7*** | ***Atembeschwerden (ohne körperliche Anstrengung)*** |  |
| **8** | **Hitze- oder Kältewallungen**  **(sich grundlos plötzlich heiß oder kalt fühlen)** | **Hitze- oder Kältewallungen** |
| 9 | Taubheit oder Kribbeln in Teilen des Körpers |  |
| **10** | **Kloßgefühl im Hals oder Schluckbeschwerden** |  |
| 11 | Schwächegefühl (sich schwach fühlen) in Teilen des Körpers | Schwächegefühl in Teilen des Körpers |
| **12** | **Schweregefühl in Armen oder Beinen**  **(sind zu schwer zum Bewegen)** |  |
| 13 | Übelkeit oder Magenverstimmung (dir ist schlecht) | Übelkeit oder Magenverstimmung |
| 14 | Verstopfung  (Schwierigkeiten beim groß aufs Klo gehen) | Verstopfung  (Schwierigkeiten beim Stuhlgang) |
| 15 | Durchfall |  |
| 16 | Bauch- oder Magenschmerzen |  |
| ***17*** | ***die Stimme verlieren*** |  |
| **18** | **Blähungen (Bauch fühlt sich aufgebläht an)** |  |
| ***19*** | ***verschiedene Lebensmittel (Essen) nicht vertragen*** |  |
| 20 | Schmerzen im Knie, Ellbogen oder anderen Gelenken |  |
| 21 | Schmerzen in Armen oder Beinen |  |
| *Note.* Items that were assumed to show weak psychometric properties due to linguistic effects are indicated in italics. These items should remain in the revised (P-)CSI in order to conduct research on their psychometric properties after their modification. Items that have been changed in their phrasing or that have been added explanatory specifications are shown in bold. Items of the P-CSI are only displayed when they differ from the CSI items. | | |
